# Supplementary material for: High voltage, solvent-free solid polymer electrolyte based on a star-comb PDLLA–PEG copolymer for lithium ion batteries
Source: Royal Society of Chemistry journal article supplement (doi:10.1039/c7ra13664a), 2018-01-01
Supplement: c7ra13664a1.pdf [file c7ra13664a1.pdf]

## **High voltage, solvent-free solid polymer electrolyte based on star-comb PDLLA-PEG copolymer for lithium ion battery**

Bingbing Wang<sup>a,b†</sup>, Hongming Lou<sup>a</sup>, Junpeng Zhao<sup>c</sup>, Qiao Shi<sup>d</sup>, Hongli Xu<sup>b</sup>, Yonghong Deng<sup>b\*</sup>

School of Chemistry and Chemical Engineering, South China University of Technology, Guangzhou,

China, 516640.

### **Corresponding Author**

\* Yonghong Deng. E-mail: yhdeng08@163.com

## Supporting Information

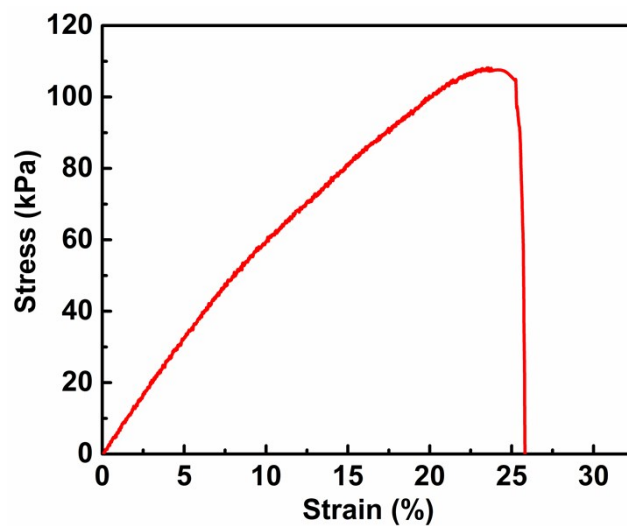

Fig. S1 Stress-strain curve for PDLLA-SPE with the molar ratio of EO/Li<sup>+</sup> = 16:1.

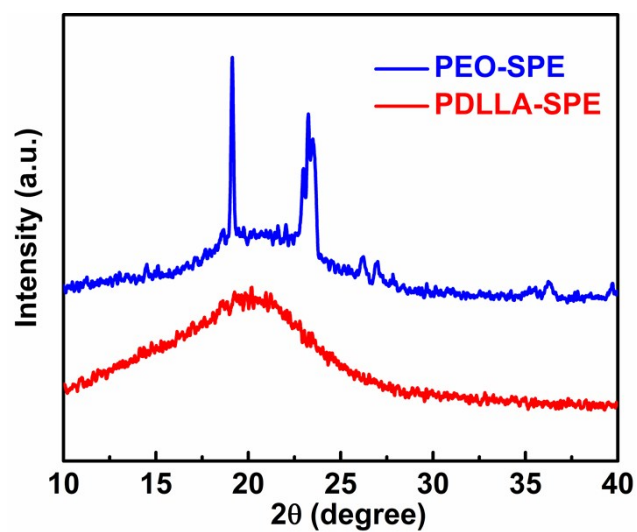

Fig. S2 XRD patterns of PDLLA-SPE and PEO-SPE with the molar ratio of EO/Li<sup>+</sup> = 16:1.

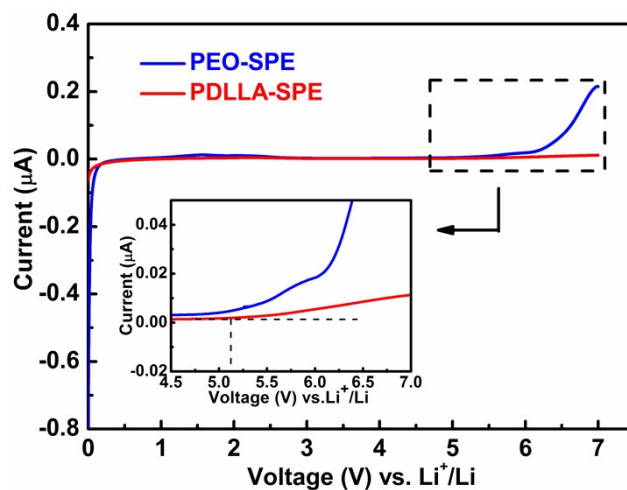

Fig. S3 The linear voltammetry curves of PDLLA-SPE and PEO-SPE at room temperature.
